# Supplementary material for: A sequential impairment of cortical astrocytes and GABAergic neurons during ischemia is improved by mGluR1,5 activation
Source: Springer Nature journal article supplement (doi:10.1007/s10072-012-1220-9), 2012-10-30
Supplement: MOESM1 [file 10072_2012_1220_MOESM1_ESM.doc]

**Supplemental data to: Neurological Sciences**

**A sequential impairment of cortical astrocytes and GABAergic neurons during ischemia is improved by mGluR1,5 activation**

**Keywords:** ischemia, mGluR, astrocyte, GABA neuron, glutamate transport and action potential.


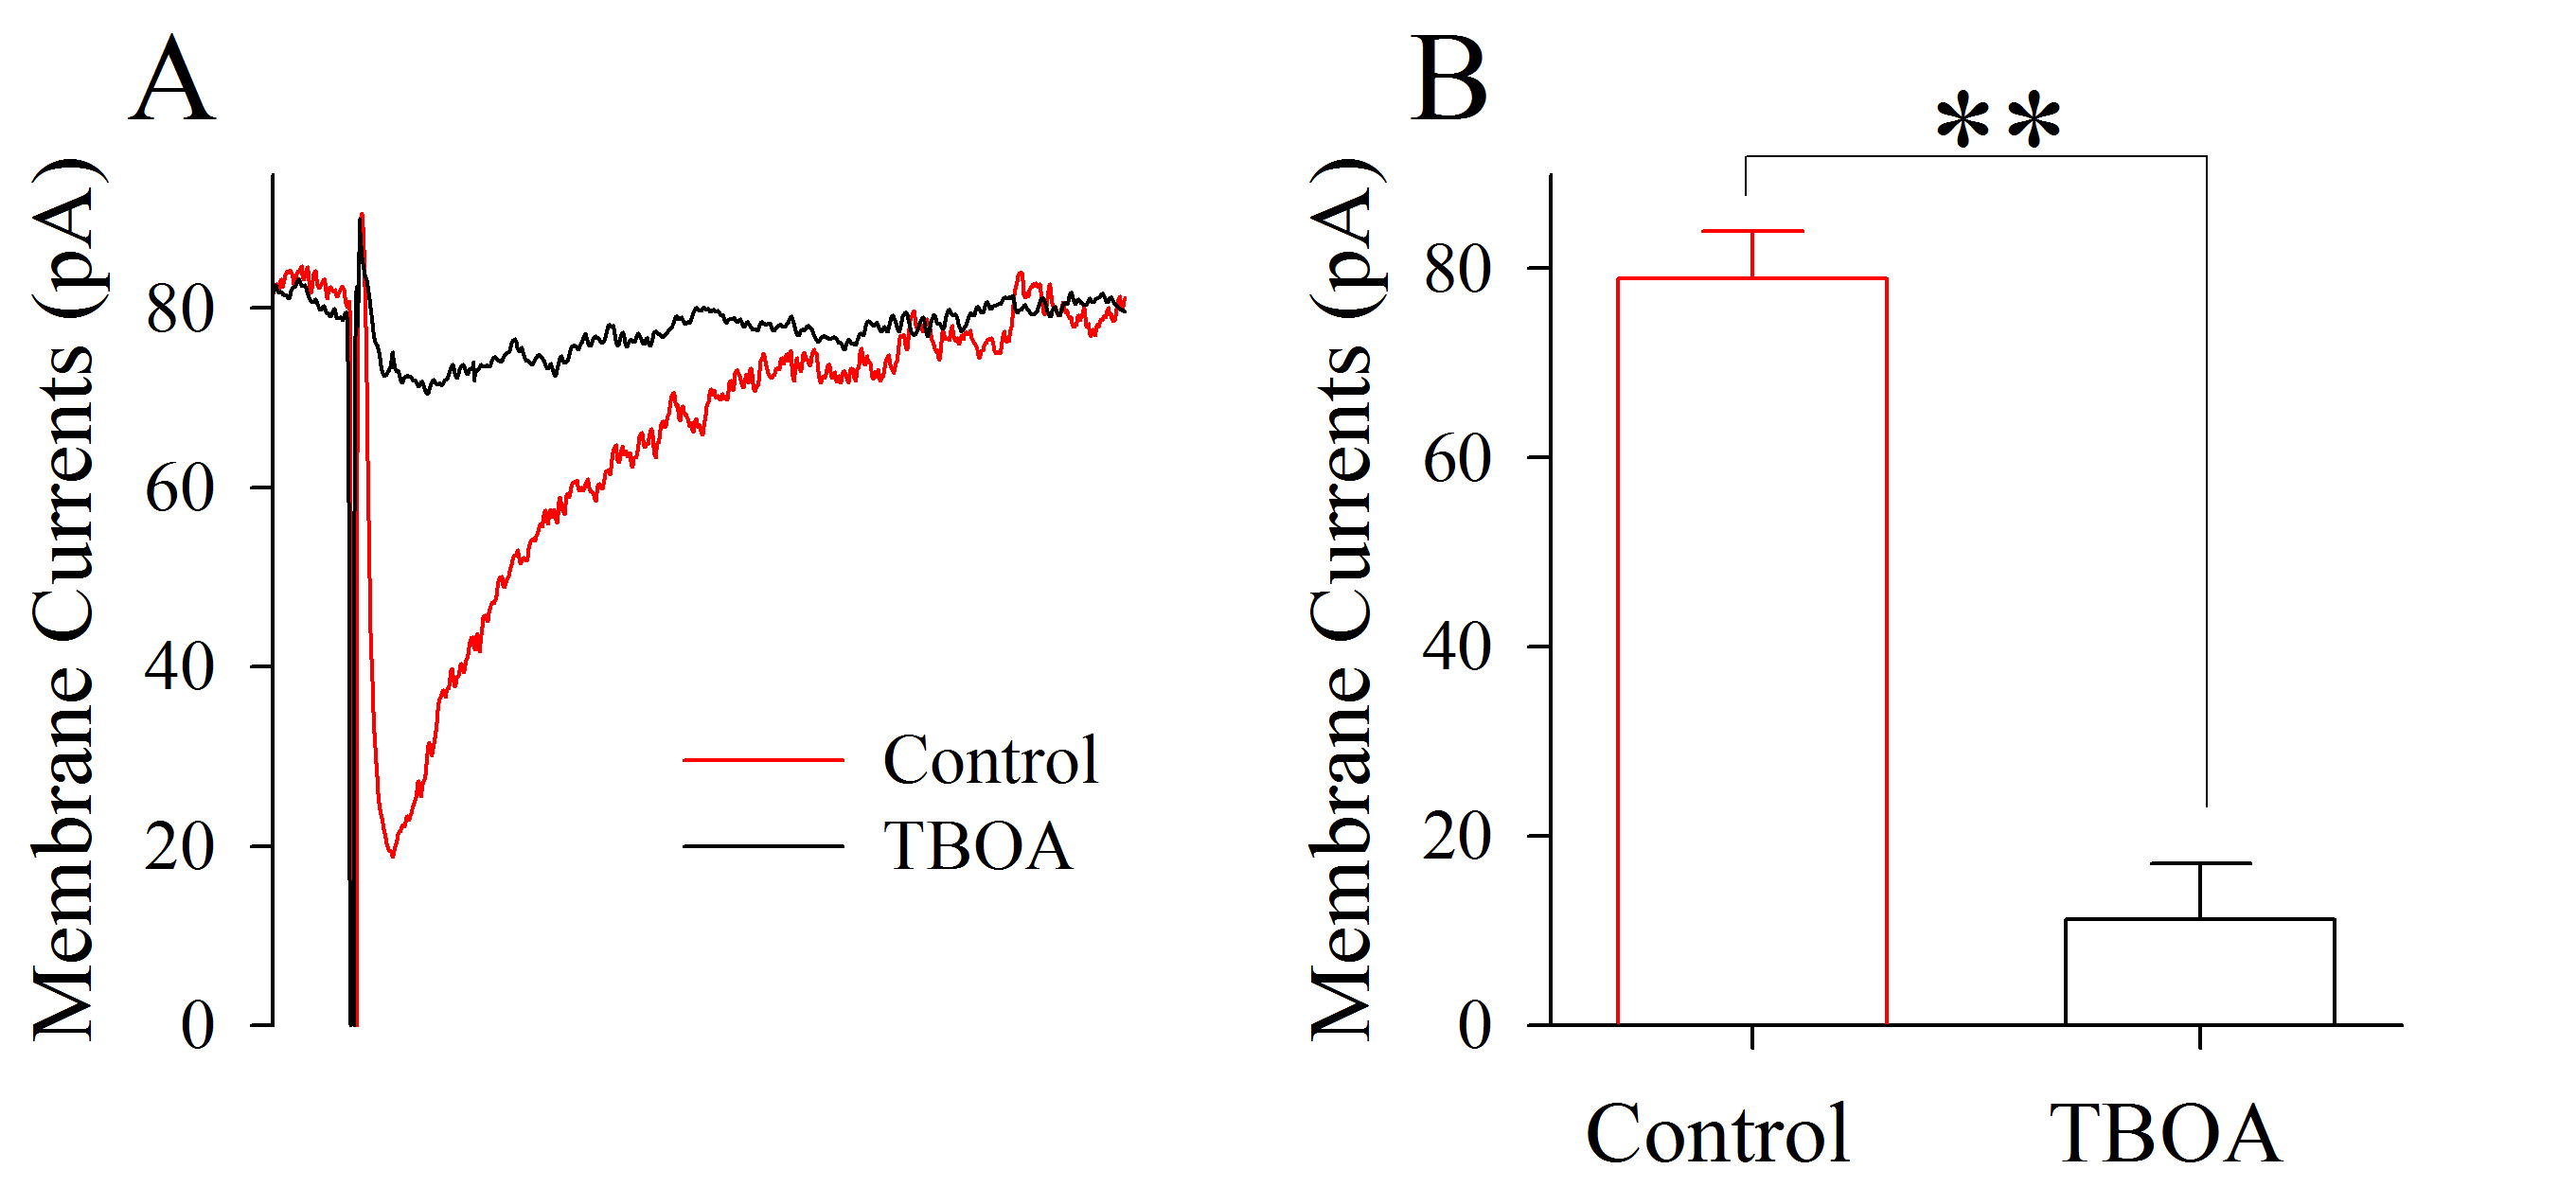


**Figure S1** Stimulus-induced membrane currents at the astrocytes of cortical slices are blocked by 10 M DL-threo-β-Benzyloxyaspartate (TBOA, a specific antagonist of glutamate transporters), indicating that the currents recorded in our studies are produced by glutamate transporters. **A)** shows superimposed waveforms under the conditions of control (red trace) and subsequent TBOA application (black trace). **B)** illustrates the statistical comparison of membrane currents under the conditions of control (red bar) and TBOA application (black bar; p<0.01, n=7 cells).
